# Supplementary material for: Morphology and Rheology of a Cool-Gel (Protein) Blended with a Thermo-Gel (Hydroxypropyl Methylcellulose)
Source: MDPI journal article supplement (doi:10.3390/foods11010128), 2022-01-05
Supplement: s1 [file s1]

## Supplementary Materials

This supporting information file contains the following:

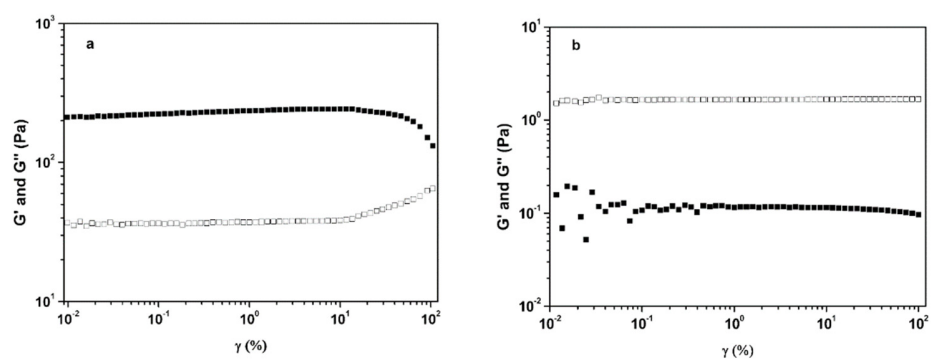

**Figure S1.** Strain sweep curves for 6% gelatin (a) and 6% HPMC (b) solutions at a frequency of 1 Hz at 25 °C. The solid and hollow symbols represent  $G'$  and  $G''$ , respectively.
